# Supplementary material
Source: PubMed Central journal article supplement (PMC3732956)
Supplement: 1310735110_pnas.201310735SI.pdf [file 1310735110_pnas.201310735SI.pdf]

# Supporting Information

Li-Byarlay et al. 10.1073/pnas.1310735110

## SI Materials and Methods

**Image Processing.** Treated and control bees were carefully paired. The fluorescent intensity of small interference RNA (siRNA) and nanoparticles (NPs) was measured by Axiovision software via the Measure  $\Rightarrow$  Interactive Measurement  $\Rightarrow$  Start Measurement function. All image data were saved in AxioVision ZVI format. Green channel (NP) and red channel (siRNA) signals were obtained separately and also compared with the background signals to ensure the baseline. A *t* test was used to assess statistical significance: control ( $n = 10$ ) and *dnmt3* knockdown (KD;  $n = 7$ ). All of the parameters for confocal setting were the same across all samples, including control and treatment bees.

**RNA Isolation and Quantitative PCR.** RNA was extracted from the fat bodies of each individual bee with the RNeasy kit according to the manufacturer's instructions (Qiagen). Knockdown of *dnmt3* was confirmed by quantitative PCR (qPCR) performed as previously described (1). We selected individuals showing typical KD for RNA sequencing (RNAseq). Primers designed for qPCR experiments and validations of alternative splicing (AS) are listed in Table S4. Sample sizes were 10 treated and 10 control individuals. Primers were designed to cross splice junction-spanning regions of the gene. Genomic DNA was also examined for each primer pair.

**RNAseq.** Of the 1,190 unexpressed genes, 762 are single-exon genes; only 389 unexpressed genes were annotated in a previous and more conservative annotation OGS v2.0. Read number for each sample is as follows—control sample: 1, 30,689,062 reads ( $\times 2$ ); 2, 28,092,866 reads ( $\times 2$ ); 3, 27,851,575 reads ( $\times 2$ ); 4, 35,186,360 reads ( $\times 2$ ); 5, 29,145,865 reads ( $\times 2$ ); 6, 28,622,027 reads ( $\times 2$ ); *dnmt3* KD sample: 1, 22,658,937 reads ( $\times 2$ ); 2, 36,595,658 reads ( $\times 2$ ); 3, 29,284,924 reads ( $\times 2$ ); 4, 33,208,262 reads ( $\times 2$ ); 5, 31,488,264 reads ( $\times 2$ ); 6, 34,883,306 reads ( $\times 2$ ).

**Differential Expression Analysis.** TrueSight assigns a probability score to each of the predicted splice junctions for each gene, which indicates their reliability based on coding potentials and RNAseq mapping quality. We used all splice junctions with a TrueSight score  $>0.5$  (on a scale from 0 to 1) to refine the honey bee gene annotation available at the time of this study (Official Gene Set v3.2). A total of 4,274 (5.05% increase) new exons and 20,473 (29.5% increase) new splice junctions were added to OGS v3.2 to improve our analysis. Because the new junctions might originate from AS (alternative exon boundary) and lead to alternative boundaries for a single exon, we extended the original exon boundaries to the most remote junctions on that exon and built a nonredundant exon model for each gene. BEDTools was used to calculate the read coverage of the non-redundant exon models based on TrueSight mapping results (in binary alignment/map format). The sum of read numbers on all exons of a gene represents the digital gene expression value. The SAM (2) permutation test was used to test for differential expression; 2,613 genes (1,357 up-regulated and 1,256 down-regulated) were determined to be differentially expressed [false discovery rate (FDR) = 0.01,  $n = 6$  treated and 6 control bees].

**Analysis of Alternative Splicing.** AS was annotated with the same procedure described in ref. 3. Results for the four subtypes of AS [intron retention (IR), exon skipping (ES), alternative exon boundary (AEB), and alternative terminal exon (ATE)] are summarized in Table 1.

**Differential Alternative Splicing.** We used two sources of information to test the significance of differentially spliced genes (DSGs). The first approach was to use RNAseq coverage, using both fully mapped reads and junction-spanning reads from RNA-seq; the second approach was to focus on splice junctions, by counting the number of junction-spanning reads from RNA-seq reads on splice junctions involved in AS.

**Testing DSG Using Exon/Intron Coverage ( $P_{cov}$ ).** DSGs including IR, ES, and ATE were detected based on the coverage ratio changes for the retaining introns, skipped exons, and alternative terminal exons, respectively. An unpaired *t* test was used to calculate the *P* value,  $P_{cov}$ , from coverage ratios. Because AEBs often differ by just a few base pairs, exon coverage information cannot be generally applied to AEB differential splicing; only splice junction mapping counts were used to calculate  $P_{count}$  (see below).

**Testing DSG Using Alternative Splice Junction Mapping Counts ( $P_{count}$ ).** The change in the number of RNA-seq reads mapped onto alternative splice junctions was used to calculate another statistic to test DSG in ES, AEB, and ATE. Fisher's exact test was used to calculate the *P* value,  $P_{count}$ , from alternative splice junction mapping counts. Because IR is for intron expression rather than alternative splice junction, differential IR cannot be tested with junction mappings; only coverage information was used to get  $P_{cov}$  (see above).

$P_{cov}$  is the final *P* value for testing IR and  $P_{count}$  is the final *P* value for testing AEB. For ES and ATE, both statistical testing metrics were applied, and we used Fisher's combined probability test to obtain the final *P* values:  $\chi^2 = -2 \log(P_{cov}) - 2 \log(P_{count})$ . *P* values were adjusted for multiple hypotheses testing by using a Benjamini-Hochberg FDR criterion. The detailed testing procedure is described below for each subtype of AS.

$N(x \sim y)$  = number of reads mapped onto junction  $x \sim y$

$$Cov(x \sim y) = \frac{\sum_{i=x}^y \text{number of reads mapped onto } i}{y-x}$$

**Differential intron retention test.** For a retained intron with coordinates  $p \sim q$  and two adjacent exons  $a \sim p$ ,  $q \sim d$ , its inclusion ratio was calculated as follows:

$$\text{IR inclusion ratio} = \frac{2 * Cov(p \sim q)}{Cov(a \sim p) + Cov(q \sim d)}$$

Unpaired *t* tests were used on IR inclusion ratios to get  $P_{cov}$ , and on that basis, 27 IRs were determined to be DSG (FDR = 0.1; Benjamini-Hochberg). In the example of IR in Fig. 3, control is calculated as  $2 \times 40.6 / (168.6 + 159.1) \approx 0.25$ ; *dnmt3* KD is calculated as  $2 \times 28.8 / (196.1 + 201.9) \approx 0.14$ .

**Differential exon skipping test.** We applied both metrics to measure changes of ES by *dnmt3* KD. For an ES with coordinates  $p \sim q$  and two adjacent constitutive exons  $a \sim b$ ,  $c \sim d$ , the ES skipping ratio was calculated as follows:

$$\text{ES skipping ratio} = \frac{Cov(a \sim b) + Cov(c \sim d) - 2 * Cov(p \sim q)}{Cov(a \sim b) + Cov(c \sim d)}$$

$P_{cov}$  was calculated using an unpaired *t* test.





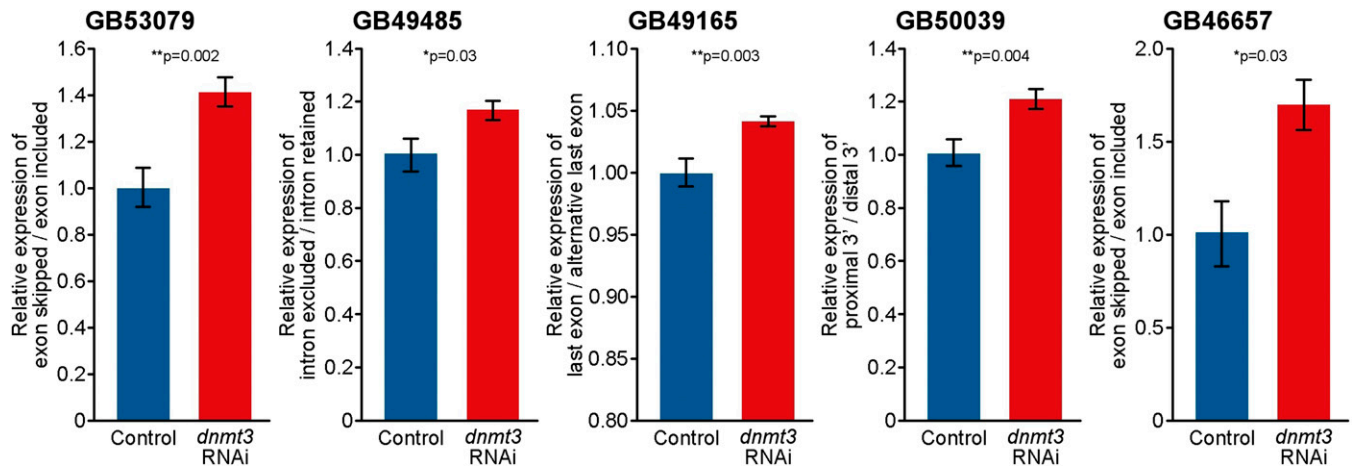

**Fig. S3.** Validation of *dnmt3* RNAi-associated alternative splicing. To validate the splicing results, gene candidates for each type of AS event were selected for qPCR analysis. ES was validated with *GB53079* (motile sperm domain-containing protein 1-like) and *GB46657* (galactokinase-like); IR with *GB49485* (probable prolyl-tRNA synthetase, mitochondrial-like); ATE with gene *GB49165* (protein RER1-like); and AEB with gene *GB50039* (methionyl-tRNA synthetase). Control:  $n \geq 10$ ; *dnmt3* KD:  $n \geq 10$ . Mean relative expression levels, SEM, and *P* values are displayed. Data analyzed with two-tailed *t* tests.

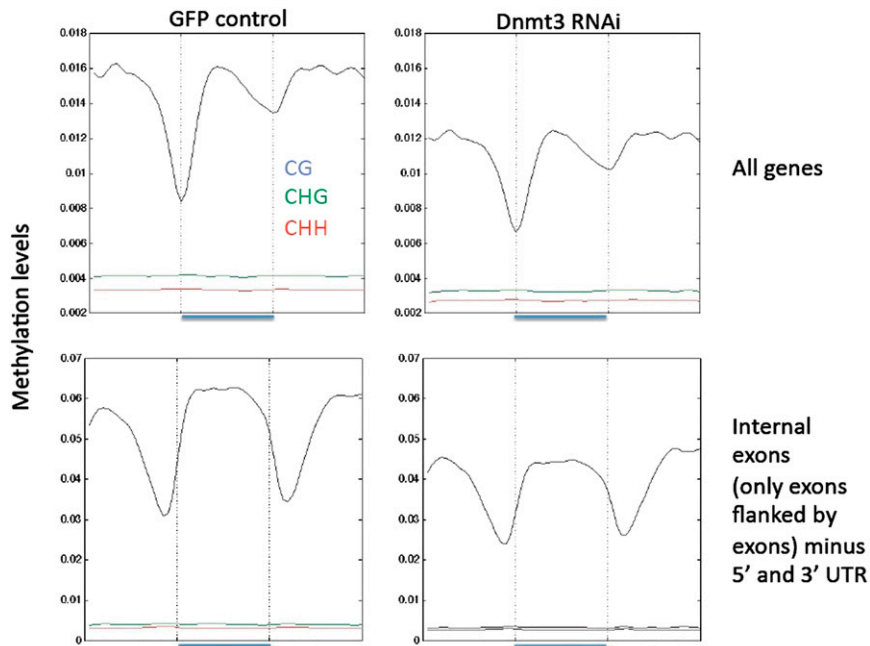

**Fig. S4.** Methylation levels for control and *dnmt3* KD bees ( $n = 1$  pooled sample for each). Top two graphs show all genes; bottom two graphs show internal exons only. C stands for cytosine, G stands for guanine, H stands for adenine (A), thymine (T), or cytosine (C). The colors blue, green, and red represent CG, CHG, and CHH sequences, respectively. The middle section (underlined blue) of each graph represents the whole gene or just the internal exon.

**Table S1. Gene Ontology (biological process) analysis of genes that were differentially expressed between control bees and *dnmt3* KD bees (Benjamini cutoff: <0.01)**

| Term                                                                  | Count | Percentage | <i>P</i> value | Fold enrichment | Benjamini |
|-----------------------------------------------------------------------|-------|------------|----------------|-----------------|-----------|
| GO:0042254~ribosome biogenesis                                        | 44    | 2.31       | 2.91E-20       | 4.32            | 7.21E-17  |
| GO:0022613~ribonucleoprotein complex biogenesis                       | 51    | 2.68       | 4.23E-17       | 3.41            | 5.24E-14  |
| GO:0034660~ncRNA metabolic process                                    | 61    | 3.21       | 9.67E-16       | 2.88            | 8.25E-13  |
| GO:0006396~RNA processing                                             | 102   | 5.36       | 1.25E-13       | 2.06            | 7.74E-11  |
| GO:0034470~ncRNA processing                                           | 43    | 2.26       | 1.27E-11       | 2.94            | 6.30E-09  |
| GO:0006364~rRNA processing                                            | 25    | 1.31       | 2.60E-10       | 3.93            | 1.07E-07  |
| GO:0006413~translational initiation                                   | 30    | 1.58       | 2.65E-10       | 3.43            | 9.37E-08  |
| GO:0016072~rRNA metabolic process                                     | 25    | 1.31       | 5.33E-10       | 3.83            | 1.65E-07  |
| GO:0046907~intracellular transport                                    | 90    | 4.73       | 7.16E-09       | 1.81            | 1.97E-06  |
| GO:0030163~protein catabolic process                                  | 65    | 3.42       | 7.51E-09       | 2.04            | 1.86E-06  |
| GO:0019941~modification-dependent protein catabolic process           | 57    | 3.00       | 1.66E-08       | 2.12            | 3.75E-06  |
| GO:0043632~modification-dependent macromolecule catabolic process     | 57    | 3.00       | 2.11E-08       | 2.11            | 4.35E-06  |
| GO:0044257~cellular protein catabolic process                         | 60    | 3.15       | 2.15E-08       | 2.06            | 4.09E-06  |
| GO:0051603~proteolysis involved in cellular protein catabolic process | 60    | 3.15       | 2.15E-08       | 2.06            | 4.09E-06  |
| GO:0034621~cellular macromolecular complex subunit organization       | 64    | 3.36       | 3.65E-08       | 1.98            | 6.45E-06  |
| GO:0034622~cellular macromolecular complex assembly                   | 55    | 2.89       | 4.84E-08       | 2.10            | 7.99E-06  |
| GO:0043933~macromolecular complex subunit organization                | 80    | 4.21       | 8.81E-08       | 1.79            | 1.36E-05  |
| GO:0006399~tRNA metabolic process                                     | 37    | 1.95       | 1.08E-07       | 2.48            | 1.57E-05  |
| GO:0065003~macromolecular complex assembly                            | 72    | 3.79       | 1.31E-07       | 1.84            | 1.81E-05  |
| GO:0044265~cellular macromolecule catabolic process                   | 67    | 3.52       | 1.89E-07       | 1.87            | 2.47E-05  |
| GO:0007010~cytoskeleton organization                                  | 116   | 6.10       | 2.50E-07       | 1.57            | 3.10E-05  |
| GO:0045184~establishment of protein localization                      | 79    | 4.15       | 3.59E-07       | 1.74            | 4.23E-05  |
| GO:0015031~protein transport                                          | 77    | 4.05       | 5.33E-07       | 1.74            | 6.00E-05  |
| GO:0008104~protein localization                                       | 100   | 5.26       | 6.45E-07       | 1.60            | 6.95E-05  |
| GO:0009057~macromolecule catabolic process                            | 76    | 4.00       | 9.53E-07       | 1.73            | 9.83E-05  |
| GO:0007017~microtubule-based process                                  | 102   | 5.36       | 1.06E-06       | 1.58            | 1.05E-04  |
| GO:0051169~nuclear transport                                          | 29    | 1.52       | 1.95E-06       | 2.53            | 1.86E-04  |
| GO:0006913~nucleocytoplasmic transport                                | 29    | 1.52       | 1.95E-06       | 2.53            | 1.86E-04  |
| GO:0006457~protein folding                                            | 39    | 2.05       | 3.61E-06       | 2.13            | 3.31E-04  |
| GO:0060341~regulation of cellular localization                        | 27    | 1.42       | 6.51E-06       | 2.50            | 5.75E-04  |
| GO:0000226~microtubule cytoskeleton organization                      | 77    | 4.05       | 9.17E-06       | 1.63            | 7.83E-04  |
| GO:0006886~intracellular protein transport                            | 51    | 2.68       | 1.09E-05       | 1.84            | 8.99E-04  |
| GO:0034613~cellular protein localization                              | 52    | 2.73       | 1.16E-05       | 1.83            | 9.25E-04  |
| GO:0016192~vesicle-mediated transport                                 | 95    | 4.99       | 1.17E-05       | 1.53            | 9.05E-04  |
| GO:0006605~protein targeting                                          | 36    | 1.89       | 1.76E-05       | 2.08            | 1.32E-03  |
| GO:0006325~chromatin organization                                     | 49    | 2.58       | 2.70E-05       | 1.81            | 1.96E-03  |
| GO:0016568~chromatin modification                                     | 36    | 1.89       | 3.37E-05       | 2.02            | 2.38E-03  |
| GO:0007051~spindle organization                                       | 60    | 3.15       | 3.88E-05       | 1.68            | 2.66E-03  |
| GO:0006612~protein targeting to membrane                              | 15    | 0.79       | 4.45E-05       | 3.25            | 2.98E-03  |
| GO:0007052~mitotic spindle organization                               | 53    | 2.79       | 5.93E-05       | 1.72            | 3.86E-03  |
| GO:0044087~regulation of cellular component biogenesis                | 28    | 1.47       | 5.99E-05       | 2.20            | 3.80E-03  |
| GO:0016044~membrane organization                                      | 78    | 4.10       | 6.32E-05       | 1.54            | 3.90E-03  |
| GO:0007242~intracellular signaling cascade                            | 73    | 3.84       | 9.41E-05       | 1.55            | 5.67E-03  |
| GO:0009451~RNA modification                                           | 17    | 0.89       | 1.02E-04       | 2.81            | 6.01E-03  |
| GO:0000022~mitotic spindle elongation                                 | 27    | 1.42       | 1.03E-04       | 2.18            | 5.93E-03  |
| GO:0006897~endocytosis                                                | 65    | 3.42       | 1.13E-04       | 1.58            | 6.33E-03  |
| GO:0010324~membrane invagination                                      | 65    | 3.42       | 1.13E-04       | 1.58            | 6.33E-03  |
| GO:0006338~chromatin remodeling                                       | 19    | 1.00       | 1.20E-04       | 2.60            | 6.59E-03  |
| GO:0043623~cellular protein complex assembly                          | 28    | 1.47       | 1.22E-04       | 2.12            | 6.57E-03  |
| GO:0070727~cellular macromolecule localization                        | 62    | 3.26       | 1.28E-04       | 1.60            | 6.75E-03  |
| GO:0051231~spindle elongation                                         | 27    | 1.42       | 1.31E-04       | 2.15            | 6.74E-03  |
| GO:0006461~protein complex assembly                                   | 46    | 2.42       | 1.60E-04       | 1.73            | 8.06E-03  |
| GO:0070271~protein complex biogenesis                                 | 46    | 2.42       | 1.60E-04       | 1.73            | 8.06E-03  |
| GO:0007317~regulation of pole plasm oskar mRNA localization           | 13    | 0.68       | 1.69E-04       | 3.27            | 8.33E-03  |
| GO:0006909~phagocytosis                                               | 52    | 2.73       | 1.81E-04       | 1.66            | 8.73E-03  |

**Table S2. Effects of *dnmt3* KD on expression and methylation of genes known to encode splicing factors (based on orthology to *Drosophila melanogaster*)**

| OGS3.2 Gene name | Up-regulated (Q value) | Down-regulated (Q value) | Fold change | Fold change: gene body methylation | Fold change: promoter | Fly ortholog | Gene function                                                                                                                                                                                          |
|------------------|------------------------|--------------------------|-------------|------------------------------------|-----------------------|--------------|--------------------------------------------------------------------------------------------------------------------------------------------------------------------------------------------------------|
| <i>GB51710</i>   |                        | 0.61                     | 0.81        | 1.22                               | 0.49                  | FBgn0001942  | Eukaryotic initiation factor 4A-like                                                                                                                                                                   |
| <i>GB50757</i>   |                        | 0.53                     | 0.85        | 0.66                               | 0.71                  | FBgn0022987  | KH domain-containing, RNA-binding, signal transduction-associated protein 3-like [ <i>Apis mellifera</i> ]                                                                                             |
| <i>GB55439</i>   |                        | 0.49                     | 0.89        | 1.04                               | 0.00                  | FBgn0010220  | DEAD box protein 45A ortholog                                                                                                                                                                          |
| <i>GB42714</i>   | 0.68                   |                          | 1.11        | 0.99                               | 0.63                  | FBgn0086683  | Splicing factor 45-like                                                                                                                                                                                |
| <i>GB49296</i>   | 0.85                   |                          | 1.11        | 0.80                               | 1.96                  | FBgn0030974  | U2AF <sub>lg</sub> ; U2 snRNP auxiliary factor, large subunit, splicing factor                                                                                                                         |
| <i>GB48312</i>   | 0.25                   |                          | 1.13        | 0.99                               | 0.94                  | FBgn0037220  | Pre-mRNA-splicing factor RBM22-like                                                                                                                                                                    |
| <i>GB48261</i>   | 0.06                   |                          | 1.15        |                                    |                       | FBpp0084626  | 116-kDa U5 small nuclear ribonucleoprotein component-like                                                                                                                                              |
| <i>GB50695</i>   | 0.56                   |                          | 1.17        | 0.98                               | 0.98                  | FBgn0086444  | Probable pre-mRNA-splicing factor ATP-dependent RNA helicase mog-4-like                                                                                                                                |
| <i>GB44439</i>   | 0.09                   |                          | 1.18        | 1.10                               | 1.13                  | FBgn0037573  | Eukaryotic initiation factor 4A-III-like                                                                                                                                                               |
| <i>GB50078</i>   | 0.62                   |                          | 1.20        | 0.67                               | 0.75                  | FBgn0015331  | ATP-dependent RNA helicase activity                                                                                                                                                                    |
| <i>GB51256</i>   | 0.09                   |                          | 1.25        | 0.53                               | 0.98                  | FBgn0036314  | PRP11; Splicing factor 3a, subunit 2 [RNA processing and modification]                                                                                                                                 |
| <i>GB42720</i>   | 0.09                   |                          | 1.36        | 1.12                               | 1.29                  | FBgn0014189  | Helicase at 25E ortholog                                                                                                                                                                               |
| <i>GB42279</i>   | 0.21                   |                          | 1.38        | 0.97                               | 0.00                  | Null         | DEADc; DEAD-box helicases; a diverse family of proteins involved in ATP-dependent RNA unwinding, needed in a variety of cellular processes including splicing, ribosome biogenesis and RNA degradation |
| <i>GB40538</i>   | 0.09                   |                          | 1.67        | 1.40                               | 0.91                  | FBgn0021995  | Probable ATP-dependent RNA helicase DDX27-like                                                                                                                                                         |
| <i>GB50605</i>   | 0.09                   |                          | 1.70        | 0.76                               | 0.00                  | FBgn0038609  | Putative pre-mRNA-splicing factor ATP-dependent RNA helicase DHX15-like                                                                                                                                |
| <i>GB44884</i>   | 0.21                   |                          | 1.89        | 0.98                               | 1.59                  | FBgn0035162  | Splicing factor 3b, subunit 3, 130 kDa                                                                                                                                                                 |

Gene list obtained from the National Center for Biotechnology Information (NCBI) database.

**Table S3. siRNA sequence designed for RNA interference (ref. 1)**

| siRNA                              | Sense                    | Antisense                |
|------------------------------------|--------------------------|--------------------------|
| EGFP-S1 DS positive control duplex | ACCCUGAAGUUCAUCGCACCACCG | CGGUGCAGAUGAACUUCAGCCUCA |
| <i>dnmt3</i>                       | GUCAACGUAGAUUUGACGCdTdT  | GCGUCAAUUCACGUUGACdTdT   |

1. Kucharski R, Maleszka J, Foret S, Maleszka R (2008) Nutritional control of reproductive status in honeybees via DNA methylation. *Science* 319(5871):1827–1830.

**Table S4. Primers used for qPCR experiments**

| Primer names          | Forward                                 | Reverse                                |
|-----------------------|-----------------------------------------|----------------------------------------|
| Eif3-S8               | TGA GTG TCT GCT ATG GAT TGC AA          | TCG CGG CTC GTG GTA AA                 |
| GAPDH                 | ACT GGT ATG GCC TTC CGT GTA C           | TGC CAA GTC TAA CTG TTA AGT CAA CA     |
| <i>dnmt3</i>          | TCC TGT GCC CGA CGA CTT A               | TGC AGA GGA AGC ATT CCC A              |
| GB53079 exon included | GTC CAG CTA TAC AAA TGA TTC CAG C       | ATG CTA TGG ATA AAG GAG GAA CAA A      |
| GB53079 exon skipped  | GTC CAG CTA TAC AAA TGA TTC CAG C       | CAA AAT AAA GCA ATT GAT AGA GGA ACA A  |
| GB50039 ctrl-186–495  | TCT TCC TGT TTT TCT TTT TTT TTT TGT AAC | TTT ACA ACG TGT CAA AAA TCA AGA GA     |
| GB50039 -178–495      | AAA TGT GAT TTT GCT TCA CTT TGA TAA A   | ACG TGT CAA AAA TCA AGA GAA GTT ACA A  |
| GB49165 -9476082–2735 | TTC CTT AGG TTA GCG CCA AGA T           | CTC ATG GAA AAC CAA AGT ACC AGA        |
| GB49165 -9480053–2735 | CCA TCA CCA AAT TTC CAC GG              | CTC ATG GAA AAC CAA AGT ACC AGA        |
| GB53833 -9158642–8319 | TGA ACA TCA AGA CGA AGT GGA TG          | CGT CTA TAC GCT TGG TCA GCC T          |
| GB53833 -9191360–8319 | AAA TCA AGA GCA TCG TGA TCG AG          | CGT CTA TAC GCT TGG TCA GCC T          |
| GB49485 E1            | TGG CCA AAA AAT TTA GCA CCA             | TTT TCT TCT TTG CTT CCT GCC T          |
| GB49485 E2            | GAA GAA TTA AGA TGG CCA AAA AAT TTA     | ATA CCC TTT TAT ATA TTA CCT TTG GTG GT |
| GB46657 exon included | TCG TGT GAA TTT AAT CGG AGA ACA         | GTA ACC ATG GGC AAT GCC A              |
| GB46657 exon skipped  | TGT ATG TGC ACC CGG TCG                 | GCA TTA AAA GGT GGC ACA TCA C          |
